# Supplementary material for: Predictors and Treatment Strategies of Intraprocedural Rupture in Intracranial Aneurysms: A Single-Center Experience with 2302 Patients
Source: Research Square preprint supplement (doi:10.21203/rs.3.rs-374004/v1), 2021-05-03
Supplement: Supplementary file 1 [file da3fe313c3773702a5fce7c3.docx]

**Table S3. Univariate analysis for IPR of ICA Bifurcation aneurysms**

| Characteristic | Non-IPR (n=28) | IPR (n=1) | P-Value |
| --- | --- | --- | --- |
| Age (years) | | | 0.690 |
| Mean ± SD | 54.93 ± 12.015 | 50.00 |  |
| Sex | | | 1.000 |
| Male | 14 | 1 |  |
| Female | 14 | 0 |  |
| Number of SAH | | | 1.000 |
| 0 | 5 | 0 |  |
| 1 | 20 | 1 |  |
| ≥2 | 3 | 0 |  |
| H-H grade at admission | | | 1.000 |
| I | 5 | 0 |  |
| II | 17 | 1 |  |
| III | 6 | 0 |  |
| IV | 0 | 0 |  |
| V | 0 | 0 |  |
| Side | | | 0.483 |
| Left | 13 | 1 |  |
| Right | 15 | 0 |  |
| Fisher score | | | 0.138 |
| I | 5 | 0 |  |
| II | 8 | 0 |  |
| III | 12 | 0 |  |
| Ⅳ | 3 | 1 |  |
| V | 0 | 0 |  |
| Size (mm) | | | 0.414 |
| ≤5 | 17 | 0 |  |
| 5.1-10 | 6 | 1 |  |
| 10.1-25 | 4 | 0 |  |
| >25 | 1 | 0 |  |
| Operation timing (days) | | | 0.448 |
| ＜3 | 8 | 1 |  |
| 3-14 | 16 | 0 |  |
| ＞14 | 4 | 0 |  |
| Number of aneurysms | | | 0.172 |
| 1 | 24 | 0 |  |
| 2 | 3 | 1 |  |
| 4 | 1 | 0 |  |

IPR, Intraprocedural Rupture; SD, Standard Deviation; SAH, Subarachnoid Hemorrhage; H-H, Hunt-Hess; ICA, Internal Carotid Artery.
